# Supplementary material for: Cadmium sulfide quantum dots anchored on reduced graphene oxide for the electrochemical detection of metronidazole
Source: Royal Society of Chemistry journal article supplement (doi:10.1039/d0nj05501h), 2021-01-01
Supplement: d0nj05501h1.pdf [file d0nj05501h1.pdf]

**Cadmium Sulfide Quantum Dots anchored on Reduced Graphene Oxide for Electrochemical Detection of Metronidazole**

**Praveen Kumar Gopi<sup>a</sup>, Ganesh Kesavan<sup>a</sup>, Shen-Ming Chen<sup>a\*</sup>, Chandan Hunsur Ravikumar<sup>b</sup>**

<sup>a</sup>Electroanalysis and Bioelectrochemistry Lab, Department of Chemical Engineering and Biotechnology, National Taipei University of Technology, Taipei 106, Taiwan, ROC.

<sup>b</sup>School of Bio resources and Technology, King Mongkut's University of Technology Thonburi (KMUTT), Bangkok 10150, Thailand

**\*Corresponding Authors**

**E-mail:** [smchen78@ms15.hinet.net](mailto:smchen78@ms15.hinet.net) (S-M Chen),

**Fax:** +886 2270 25238; **Tel:** +886 2270 17147.

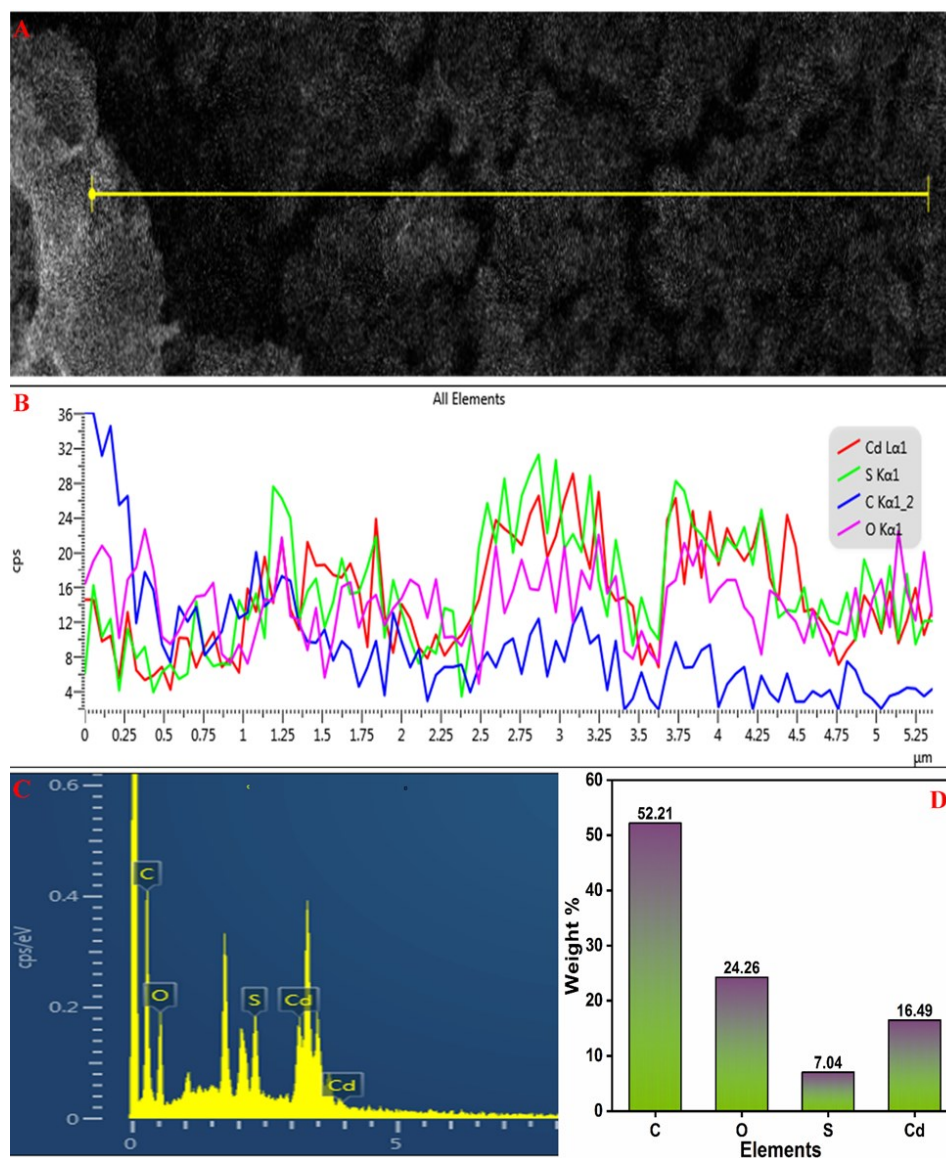

Fig. S1. (A) FESEM image of CdS QD@rGO, (B) line spacing data of CdS QD@rGO, C & D shows the EDX spectra and the wt% of the element present in the composition

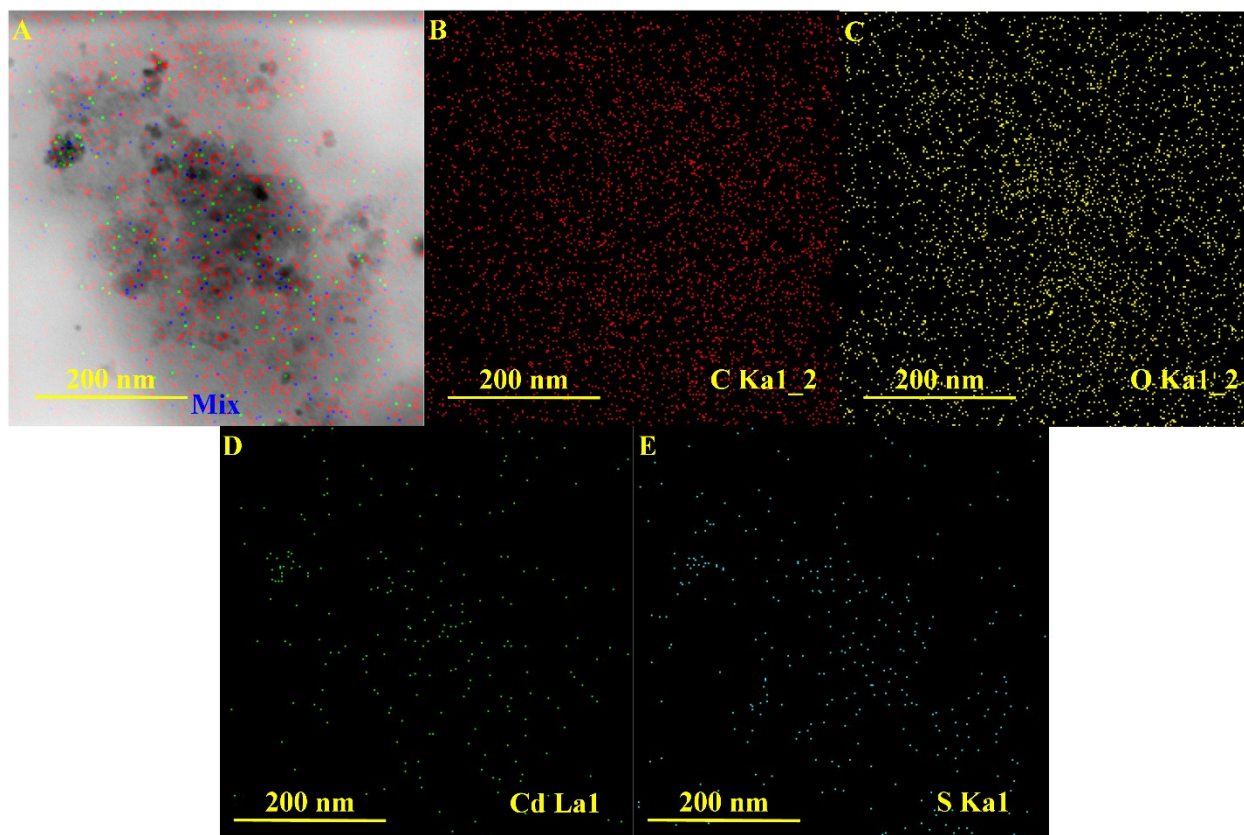

Fig. S2. (A-E) EDAX elemental mapping of CdS QD@rGO

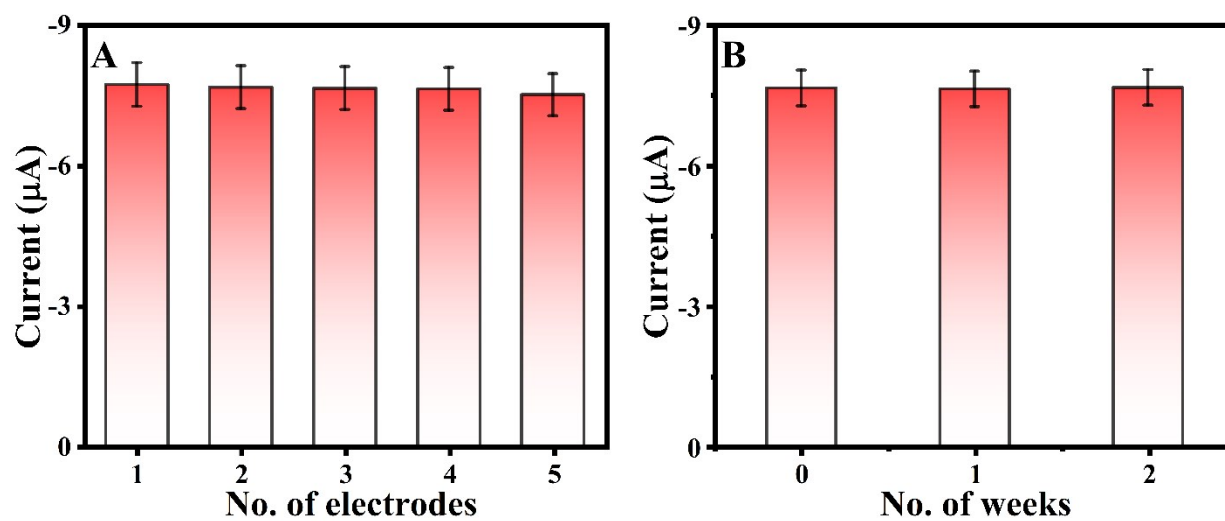

Fig. S3. (A) The bar plot of MTZ on CdS QDs@rGO sensor by different electrodes and number of weeks.
